# Supplementary material for: Stroke injury, cognitive impairment and vascular dementia
Source: PubMed Central journal article supplement (PMC4827373; doi:10.1016/j.bbadis.2016.01.015), 2016-05
Supplement: mmc1.pdf [file mmc1.pdf]

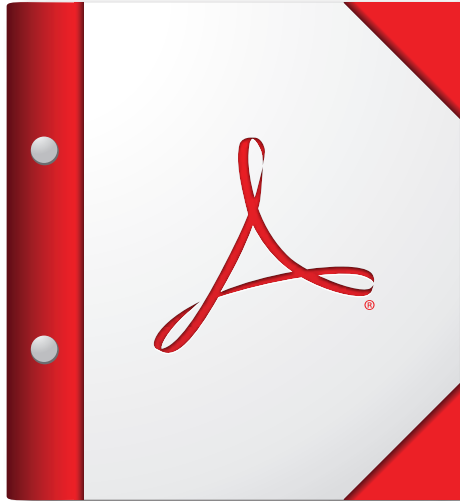

**For the best experience, open this PDF portfolio in  
Acrobat 9 or Adobe Reader 9, or later.**

[Get Adobe Reader Now!](#)
